# Supplementary material for: Anti-Tumoral Effect of Chemerin on Ovarian Cancer Cell Lines Mediated by Activation of Interferon Alpha Response
Source: MDPI journal article supplement (doi:10.3390/cancers14174108), 2022-08-25
Supplement: s1 [file s1]

**Table S1 (a)** Genes exhibiting the strongest increase of transcript levels 48 h after chemerin treatment in the indicated ovarian cancer cell lines, as assessed by Affymetrix Human Clariom S arrays.

| OVCAR-3 chemerin up-regulated genes (top 10) |                                                             |                     |
|----------------------------------------------|-------------------------------------------------------------|---------------------|
| <i>Gene</i>                                  | <i>Gene name</i>                                            | <i>-fold change</i> |
| IFI44L                                       | interferon-induced protein 44-like                          | 23,82               |
| IFI27                                        | interferon, alpha-inducible protein 27                      | 22,20               |
| IFIT1                                        | interferon-induced protein with tetratricopeptide repeats 1 | 16,49               |
| IFI6                                         | interferon, alpha-inducible protein 6                       | 14,09               |
| BST2                                         | bone marrow stromal cell antigen 2                          | 9,29                |
| MX1                                          | MX dynamin-like GTPase 1                                    | 9,01                |
| IRF9                                         | interferon regulatory factor 9                              | 5,82                |
| OAS1                                         | 2-5-oligoadenylate synthetase 1                             | 5,54                |
| SAMD9L                                       | sterile alpha motif domain containing 9-like                | 3,69                |
| CNTNAP3                                      | Salzman2013 ANNOTATED, CDS, best transcript NM_001201380    | 3,64                |
| OAW-42 chemerin up-regulated genes (top 10)  |                                                             |                     |
| <i>Gene</i>                                  | <i>Gene name</i>                                            | <i>-fold change</i> |
| IFI6                                         | interferon, alpha-inducible protein 6                       | 14,96               |
| OAS1                                         | 2-5-oligoadenylate synthetase 1                             | 8,23                |
| IRF9                                         | interferon regulatory factor 9                              | 5,83                |
| EPS8                                         | epidermal growth factor receptor pathway substrate 8        | 4,43                |
| TINAGL1                                      | tubulointerstitial nephritis antigen-like 1                 | 3,98                |
| IFI27                                        | interferon, alpha-inducible protein 27                      | 3,92                |
| ADA                                          | adenosine deaminase                                         | 3,63                |
| IFIT1                                        | interferon-induced protein with tetratricopeptide repeats 1 | 3,63                |
| BST2                                         | bone marrow stromal cell antigen 2                          | 3,54                |
| IFIH1                                        | interferon induced, with helicase C domain 1                | 3,39                |
| SK-OV-3 chemerin up-regulated genes (top 10) |                                                             |                     |
| <i>Gene</i>                                  | <i>Gene name</i>                                            | <i>-fold change</i> |
| IFI27                                        | interferon, alpha-inducible protein 27                      | 68,42               |
| OAS1                                         | 2-5-oligoadenylate synthetase 1                             | 44,46               |
| OAS2                                         | 2-5-oligoadenylate synthetase 2                             | 39,94               |
| XAF1                                         | XIAP associated factor 1                                    | 38,62               |
| IFI6                                         | interferon, alpha-inducible protein 6                       | 33,44               |
| MX1                                          | MX dynamin-like GTPase 1                                    | 30,31               |
| IRF9                                         | interferon regulatory factor 9                              | 13,37               |
| IFI44L                                       | interferon-induced protein 44-like                          | 10,83               |
| IFIT1                                        | interferon-induced protein with tetratricopeptide repeats 1 | 7,85                |
| OAS3                                         | 2-5-oligoadenylate synthetase 3                             | 6,95                |

**Table S1 (b)** Genes exhibiting the strongest reduction of transcript levels 48 h after chemerin treatment in the indicated ovarian cancer cell lines, as assessed by Affymetrix Human Clariom S arrays.

| OVCAR-3 chemerin down-regulated genes (top 10) |                                                                      |                     |
|------------------------------------------------|----------------------------------------------------------------------|---------------------|
| <i>Gene symbol</i>                             | <i>Gene name</i>                                                     | <i>-fold change</i> |
| ANKRD18B                                       | ankyrin repeat domain 18B                                            | -3,00               |
| NDUFA8                                         | Transcript Identified by AceView, Entrez Gene ID(s) 4702             | -3,03               |
| ZNF200                                         | Transcript Identified by AceView, Entrez Gene ID(s) 7752             | -3,06               |
| NR2E1                                          | nuclear receptor subfamily 2, group E, member 1                      | -3,07               |
| ISPD                                           | isoprenoid synthase domain containing                                | -3,15               |
| FLJ45513                                       | uncharacterized LOC729220                                            | -3,40               |
| TMEM155                                        | transmembrane protein 155                                            | -3,54               |
| ZNF730                                         | zinc finger protein 730                                              | -3,59               |
| AMTN                                           | amelotin                                                             | -3,63               |
| TNFRSF11B                                      | tumor necrosis factor receptor superfamily, member 11b               | -4,47               |
| OAW-42 chemerin down-regulated genes (top 10)  |                                                                      |                     |
| <i>Gene symbol</i>                             | <i>Gene name</i>                                                     | <i>-fold change</i> |
| SLC38A9                                        | Transcript Identified by AceView, Entrez Gene ID(s) 153129           | -4,28               |
| POGZ                                           | Transcript Identified by AceView, Entrez Gene ID(s) 23126            | -4,45               |
| EXOC4                                          | exocyst complex component 4                                          | -4,60               |
| GPCPD1                                         | Transcript Identified by AceView, Entrez Gene ID(s) 56261            | -5,08               |
| EXT1                                           | Jeck2013 ALT_ACCEPTOR, ALT_DONOR, coding, INTERNAL, intronic best    | -5,62               |
| PTBP2                                          | Transcript Identified by AceView, Entrez Gene ID(s) 58155            | -5,98               |
| WWP1                                           | Transcript Identified by AceView, Entrez Gene ID(s) 11059            | -6,07               |
| EXT1                                           | Jeck2013 ALT_ACCEPTOR, ALT_DONOR, coding, INTERNAL, intronic best    | -6,15               |
| PPM1B                                          | Memczak2013 ANTISENSE, coding, INTERNAL, intronic best transcript    | -6,87               |
| OCLM                                           | Transcript Identified by AceView, Entrez Gene ID(s) 10896            | -7,01               |
| SK-OV-3 chemerin down-regulated genes (top 10) |                                                                      |                     |
| <i>Gene symbol</i>                             | <i>Gene name</i>                                                     | <i>-fold change</i> |
| FILIP1                                         | filamin A interacting protein 1                                      | -2,63               |
| SPATA5                                         | Transcript Identified by AceView, Entrez Gene ID(s) 166378           | -2,70               |
| VAPA                                           | Memczak2013, coding, INTERNAL, intronic best transcript NM_003574    | -2,76               |
| LRRC28                                         | Transcript Identified by AceView, Entrez Gene ID(s) 123355           | -2,90               |
| GNGT1                                          | (G protein), gamma transducing activity polypeptide 1                | -2,98               |
| PGR                                            | progesterone receptor                                                | -3,03               |
| UNC93A                                         | unc-93 homolog A (C. elegans)                                        | -3,19               |
| PHYHIPL                                        | phytanoyl-CoA 2-hydroxylase interacting protein-like                 | -3,32               |
| PLEKHG4B                                       | Zhang2013 coding, INTERNAL, intronic best transcript NM_052909       | -3,42               |
| PPM1B                                          | Memczak2013 ANTISENSE, coding, intronic best transcript NM_001033556 | -13,27              |
